# Supplementary material for: AAA+ ATPase chaperone p97/VCPFAF2 governs basal pexophagy
Source: PubMed Central journal article supplement — Nat Commun. 2024 Oct 29;15:9347. doi: 10.1038/s41467-024-53558-x (PMC11522385; doi:10.1038/s41467-024-53558-x), 2024-10-29
Supplement: 41467_2024_53558_MOESM2_ESM.pdf [file 41467_2024_53558_MOESM2_ESM.pdf]

## Reporting Summary

Nature Portfolio wishes to improve the reproducibility of the work that we publish. This form provides structure for consistency and transparency in reporting. For further information on Nature Portfolio policies, see our [Editorial Policies](#) and the [Editorial Policy Checklist](#).

### Statistics

For all statistical analyses, confirm that the following items are present in the figure legend, table legend, main text, or Methods section.

n/a Confirmed

- The exact sample size ( $n$ ) for each experimental group/condition, given as a discrete number and unit of measurement
- A statement on whether measurements were taken from distinct samples or whether the same sample was measured repeatedly
- The statistical test(s) used AND whether they are one- or two-sided  
*Only common tests should be described solely by name; describe more complex techniques in the Methods section.*
- A description of all covariates tested
- A description of any assumptions or corrections, such as tests of normality and adjustment for multiple comparisons
- A full description of the statistical parameters including central tendency (e.g. means) or other basic estimates (e.g. regression coefficient) AND variation (e.g. standard deviation) or associated estimates of uncertainty (e.g. confidence intervals)
- For null hypothesis testing, the test statistic (e.g.  $F$ ,  $t$ ,  $r$ ) with confidence intervals, effect sizes, degrees of freedom and  $P$  value noted  
*Give  $P$  values as exact values whenever suitable.*
- For Bayesian analysis, information on the choice of priors and Markov chain Monte Carlo settings
- For hierarchical and complex designs, identification of the appropriate level for tests and full reporting of outcomes
- Estimates of effect sizes (e.g. Cohen's  $d$ , Pearson's  $r$ ), indicating how they were calculated

*Our web collection on [statistics for biologists](#) contains articles on many of the points above.*

### Software and code

Policy information about [availability of computer code](#)

**Data collection** Data were acquired using software supplied by instrument manufacturer LSM710, LSM780 (ZEISS) and FV3000 (EVIDENT) for immunofluorescence. ImageQuant LAS4000 (Perkin Elmer) and Fusion SOLO S system (Vilber) for immunoblotting. BD LSR Fortessa X-20 cell sorter (BD) for Flowcytometry.

**Data analysis** ZEISS ZEN system (3.9), Microsoft 365, ImageJ v.1.54 (FIJI), Adobe Photoshop 2024 and illustrator 2024, GraphPad Prism10, FACSDiva.

For manuscripts utilizing custom algorithms or software that are central to the research but not yet described in published literature, software must be made available to editors and reviewers. We strongly encourage code deposition in a community repository (e.g. GitHub). See the Nature Portfolio [guidelines for submitting code & software](#) for further information.

### Data

Policy information about [availability of data](#)

All manuscripts must include a [data availability statement](#). This statement should provide the following information, where applicable:

- Accession codes, unique identifiers, or web links for publicly available datasets
- A description of any restrictions on data availability
- For clinical datasets or third party data, please ensure that the statement adheres to our [policy](#)

All data supporting the findings of this study are available within the paper and its Supplementary Information. Source data are provided with this paper.

## Research involving human participants, their data, or biological material

Policy information about studies with [human participants or human data](#). See also policy information about [sex, gender \(identity/presentation\), and sexual orientation](#) and [race, ethnicity and racism](#).

|                                                                    |     |
|--------------------------------------------------------------------|-----|
| Reporting on sex and gender                                        | n/a |
| Reporting on race, ethnicity, or other socially relevant groupings | n/a |
| Population characteristics                                         | n/a |
| Recruitment                                                        | n/a |
| Ethics oversight                                                   | n/a |

Note that full information on the approval of the study protocol must also be provided in the manuscript.

## Field-specific reporting

Please select the one below that is the best fit for your research. If you are not sure, read the appropriate sections before making your selection.

Life sciences       Behavioural & social sciences       Ecological, evolutionary & environmental sciences

For a reference copy of the document with all sections, see [nature.com/documents/nr-reporting-summary-flat.pdf](https://www.nature.com/documents/nr-reporting-summary-flat.pdf)

## Life sciences study design

All studies must disclose on these points even when the disclosure is negative.

|                 |                                                                                                                                                                                  |
|-----------------|----------------------------------------------------------------------------------------------------------------------------------------------------------------------------------|
| Sample size     | No statistical methods were used to predetermine sample size. The sample size in different experimental groups were determined based on previous studies or preliminary studies. |
| Data exclusions | No raw image data was excluded.                                                                                                                                                  |
| Replication     | Each experiment was repeated for two or more repeats to confirm reproducibility. All repeat experiments were successful.                                                         |
| Randomization   | To estimate significance of data, at least random 50 cells were selected for each condition group on imaging.                                                                    |
| Blinding        | n/a, Random Images are acquired.                                                                                                                                                 |

## Reporting for specific materials, systems and methods

We require information from authors about some types of materials, experimental systems and methods used in many studies. Here, indicate whether each material, system or method listed is relevant to your study. If you are not sure if a list item applies to your research, read the appropriate section before selecting a response.

### Materials & experimental systems

### Methods

| n/a                                 | Involvement                                               | n/a                                 | Involvement                                        |
|-------------------------------------|-----------------------------------------------------------|-------------------------------------|----------------------------------------------------|
| <input type="checkbox"/>            | <input checked="" type="checkbox"/> Antibodies            | <input checked="" type="checkbox"/> | <input type="checkbox"/> ChIP-seq                  |
| <input type="checkbox"/>            | <input checked="" type="checkbox"/> Eukaryotic cell lines | <input type="checkbox"/>            | <input checked="" type="checkbox"/> Flow cytometry |
| <input checked="" type="checkbox"/> | <input type="checkbox"/> Palaeontology and archaeology    | <input checked="" type="checkbox"/> | <input type="checkbox"/> MRI-based neuroimaging    |
| <input checked="" type="checkbox"/> | <input type="checkbox"/> Animals and other organisms      |                                     |                                                    |
| <input checked="" type="checkbox"/> | <input type="checkbox"/> Clinical data                    |                                     |                                                    |
| <input checked="" type="checkbox"/> | <input type="checkbox"/> Dual use research of concern     |                                     |                                                    |
| <input checked="" type="checkbox"/> | <input type="checkbox"/> Plants                           |                                     |                                                    |

## Antibodies

|                 |                                                                                                                                                              |
|-----------------|--------------------------------------------------------------------------------------------------------------------------------------------------------------|
| Antibodies used | <For immunoblotting><br>Anti-PMP70 Mouse monoclonal 70-18 SAB4200181 SIGMA AB_10639362 1:500<br>Anti-PEX14 Rabbit polyclonal (-) ABC142 Millipore (-) 1:1000 |
|-----------------|--------------------------------------------------------------------------------------------------------------------------------------------------------------|

|                                       |                               |                            |             |        |
|---------------------------------------|-------------------------------|----------------------------|-------------|--------|
| Anti-PEX16 Rabbit polyclonal (-)      | 14816-1-AP                    | Proteintech                | AB_2162250  | 1:250  |
| Anti-PEX19 Rabbit polyclonal (-)      | 14713-1-AP                    | Proteintech                | AB_2162265  | 1:500  |
| Anti-Tubulin Rat monoclonal YL1/2     | ab6160                        | abcam                      | AB_305328   | 1:3000 |
| Anti-β-Actin Mouse monoclonal 6D1     | M177-3                        | MBL                        | AB_10697039 | 1:2000 |
| Anti-USP30 Rabbit polyclonal (-)      | NBP1-81914                    | Novus Biologicals          | AB_11011210 | 1:500  |
| Anti-FAF2 Rabbit Polyclonal (-)       | 16251-1-AP                    | ProteinTech                | AB_2262469  | 1:1000 |
| Anti-Ubiquitin Mouse monoclonal P4D1  | sc-8017                       | SantaCruz                  | AB_628423   | 1:1000 |
| Anti-p97//VCP Mouse monoclonal 5      | ab11433                       | abcam                      | AB_298039   | 1:1000 |
| Anti-HA Mouse monoclonal TANA-2       | M180-3                        | MBL                        | AB_10951811 | 1:1000 |
| Anti-HA Rat monoclonal 3F10           | 12158167001                   | Roche                      | AB_390915   | 1:1000 |
| Anti-Flag Rabbit Polyclonal (-)       | PM020                         | MBL                        | AB_591224   | 1:1000 |
| Anti-Flag Mouse monoclonal FLA-1      | M185-3L                       | MBL                        | AB_11123930 | 1:2000 |
| Anti-p62 Rabbit Polyclonal (-)        | PM066                         | MBL                        | AB_10896692 | 1:1000 |
| Anti-OPTN Rabbit Polyclonal (-)       | 10837-1-AP                    | Proteintech                | AB_2156665  | 1:2000 |
| Anti-NBR1 Mouse monoclonal 4BR        | sc-130380                     | SantaCruz                  | AB_2149402  | 1:200  |
| Anti-NPLOC4 Rabbit Polyclonal (-)     | 11638-1-AP                    | Proteintech                | AB_10597107 | 1:1000 |
| Anti-UFD1 Rabbit Polyclonal (-)       | 10615-1-AP                    | Proteintech                | AB_2213944  | 1:1000 |
| Anti-NSFL1C/p47 Rabbit Polyclonal (-) | 15620-1-AP                    | Proteintech                | AB_2878158  | 1:1000 |
| Anti-PEX26 Rabbit polyclonal (-)      | NBP1-32743                    | Novus Biologicals          | AB_2268086  | 1:500  |
| Anti-HaloTag Mouse monoclonal (-)     | G9211                         | Promega                    | AB_2688011  | 1:2000 |
| Anti-TAX1BP1 Rabbit monoclonal D1D5   | 5105S                         | Cell Signaling Technology  | AB_11178939 | 1:500  |
| Anti-NDP52 Rabbit monoclonal D1E4A    | 60732                         | Cell Signaling Technology  | AB_2732810  | 1:1000 |
| HRP-conjugated goat anti-mouse        | Goat polyclonal 115-035-003   | Jackson ImmnoResearch Inc. | AB_10015289 | 1:5000 |
| HRP-conjugated goat anti-rabbit       | Goat polyclonal 111-035-144   | Jackson ImmnoResearch Inc. | AB_2307391  | 1:5000 |
| HRP-conjugated donkey anti-rat        | Donkey polyclonal 712-035-153 | Jackson ImmnoResearch Inc. | AB_2340639  | 1:5000 |
| <For immunocytochemistry>             |                               |                            |             |        |
| Anti-Catalase Mouse monoclonal 1A1    | LF-MA0003                     | AbFrontier                 | AB_1611839  | 1:1000 |
| Anti-PMP70 Mouse monoclonal 70-18     | SAB4200181                    | SIGMA                      | AB_10639362 | 1:200  |
| Anti-PEX14 Rabbit polyclonal (-)      | ABC142                        | Millipore                  | (-)         | 1:500  |
| Anti-Hsp60 Goat polyclonal (-)        | sc1052(N-20)                  | santa cruz                 | AB_631683   | 1:250  |
| Anti-LC3B Rabbit polyclonal (-)       | PM036                         | MBL                        | AB_2274121  | 1:1000 |
| Anti-p62 Rabbit Polyclonal (-)        | PM066                         | MBL                        | AB_10896692 | 1:1000 |
| Anti-OPTN Rabbit Polyclonal (-)       | 10837-1-AP                    | Proteintech                | AB_2156665  | 1:400  |
| Anti-NBR1 Mouse monoclonal 5C3        | ab55474                       | abcam                      | AB_2149404  | 1:100  |
| Anti-NDP52 Rabbit Polyclonal (-)      | GTX115378                     | GeneTex                    | AB_10620266 | 1:400  |
| Anti-TAX1BP1 rabbit monoclonal D1D5   | 5105S                         | Cell Signaling Technology  | AB_11178939 | 1:250  |
| Anti-Flag Rabbit Polyclonal (-)       | PM020                         | MBL                        | AB_591224   | 1:1000 |
| Anti-HA Rat monoclonal 3F10           | 12158167001                   | Roche                      | AB_390915   | 1:500  |
| Anti-LAMP1 Mouse monoclonal H4A3      | sc-20011                      | santa cruz                 | AB_626853   | 1:200  |
| Anti-FAF2 Rabbit Polyclonal (-)       | 16251-1-AP                    | ProteinTech                | AB_2262469  | 1:500  |
| Anti-Ubiquitin Mouse monoclonal P4D1  | sc-8017                       | SantaCruz                  | AB_628423   | 1:100  |
| Goat anti-Rabbit IgG Alexa Fluor 488  | conjugated A-11034            | Invitrogen                 | AB_2576217  | 1:2000 |
| Goat anti-Rabbit IgG Alexa Fluor 568  | conjugated A-11036            | Invitrogen                 | AB_10563566 | 1:2000 |
| Goat anti-Rabbit IgG Alexa Fluor 647  | conjugated A-21245            | Invitrogen                 | AB_2535813  | 1:2000 |
| Goat anti-Mouse IgG Alexa Fluor 488   | conjugated A-11029            | Invitrogen                 | AB_2534088  | 1:2000 |
| Goat anti-Mouse IgG Alexa Fluor 568   | conjugated A-11031            | Invitrogen                 | AB_144696   | 1:2000 |
| Goat anti-Mouse IgG Alexa Fluor 647   | conjugated A-21236            | Invitrogen                 | AB_2535805  | 1:2000 |
| Donkey anti-Goat igG Alexa Fluor 647  | conjugated A-21447            | Thermo Fisher Scientific   | AB_2535864  | 1:2000 |

## Validation

All antibodies were validated for immunofluorescence or immunoblotting. Validation reports of the commercially available antibodies were provided on the manufacturer's website; <https://www.sigmaaldrich.com/JP/ja/products/protein-biology/antibodies>, <https://www.merckmillipore.com/JP/ja/life-science-research/antibodies-assays/antibodies-overview/l6Wb.qB.p6cAAAFOKNAqQvST,nav>, <https://www.ptglab.com.jp/products/primary-antibodies/>, <https://www.abcam.co.jp/nav/primary-antibodies>, <https://ruo.mbl.co.jp/bio/ins/A/>, <https://www.novusbio.com/>, <https://www.scbt.com/ja/home>, <https://www.cellsignal.com/>, <https://www.abfrontier.com/>, <https://www.genetex.com/>, <https://www.roche.com/topic/antibodies>.

## Eukaryotic cell lines

Policy information about [cell lines and Sex and Gender in Research](#)

## Cell line source(s)

HeLa cell line (ATCC), HEK293T cell line (ATCC, CRL-3216), HCT116 cell line (ATCC, CVCL\_0291)

## Authentication

HeLa cells used in this study (Cell No. KBN0573-01) were authenticated by the Japanese Collection of Research Bioresources Cell Bank (JCRB) cell bank at the National Institute of Biomedical Innovation (Osaka, Japan) as being the same as the HeLa cell registered in ATCC.  
HEK293T cell line and HCT116 cell line were purchased from ATCC and the authentication was done by ATCC.

## Mycoplasma contamination

All cell lines have been tested negative for mycoplasma contamination.

Commonly misidentified lines  
(See [ICLAC](#) register)

There was no misidentified cell line in this study.

## Plants

Seed stocks

n/a

Novel plant genotypes

n/a

Authentication

n/a

## Flow Cytometry

### Plots

Confirm that:

- The axis labels state the marker and fluorochrome used (e.g. CD4-FITC).
- The axis scales are clearly visible. Include numbers along axes only for bottom left plot of group (a 'group' is an analysis of identical markers).
- All plots are contour plots with outliers or pseudocolor plots.
- A numerical value for number of cells or percentage (with statistics) is provided.

### Methodology

Sample preparation

Cells were resuspended in sorting buffer (phosphate buffer with 2.5% FBS).

Instrument

BD LSRFortessa X-20 cell sorter (BD)

Software

FACSDiva

Cell population abundance

For each sample, 10,000 mKeima-SKL positive cells were collected.

Gating strategy

FSC/SSC, PE-Texas Red/PE-Cy7, FITC/BV605, BV605/PETexas Red

- Tick this box to confirm that a figure exemplifying the gating strategy is provided in the Supplementary Information.
